# Supplementary material for: Expression-based discovery of candidate ovule development regulators through transcriptional profiling of ovule mutants
Source: PubMed Central journal article supplement (PMC2664812; doi:10.1186/1471-2229-9-29), 2009-03-16
Supplement: 1471-2229-9-29-S2.pdf [file 1471-2229-9-29-S2.pdf]

**Additional file 2: Pearson correlation coefficients between replicates, comparing different processing methods.**

| <b>Array Pair</b>     | <b>RMA</b>    | <b>dchip PM</b> | <b>dchip PM-MM</b> | <b>MAS5</b>   |
|-----------------------|---------------|-----------------|--------------------|---------------|
| <i>ant</i> : 1E vs 2E | 0.9941        | 0.9848          | 0.9527             | 0.9879        |
| <i>ant</i> : 2E vs 3E | 0.9975        | 0.9953          | 0.9767             | 0.9940        |
| <i>ant</i> : 1E vs 3E | 0.9934        | 0.9827          | 0.9512             | 0.9865        |
| <i>ino</i> : 1E vs 2E | 0.9953        | 0.9922          | 0.9731             | 0.9912        |
| <i>ino</i> : 2E vs 3E | 0.9962        | 0.9950          | 0.9804             | 0.9924        |
| <i>ino</i> : 1E vs 3E | 0.9967        | 0.9934          | 0.9737             | 0.9932        |
| WT: 1E vs 2E          | 0.9959        | 0.9913          | 0.9722             | 0.9907        |
| WT: 2E vs 3E          | 0.9976        | 0.9954          | 0.9807             | 0.9956        |
| WT: 1E vs 3E          | 0.9950        | 0.9873          | 0.9675             | 0.9897        |
| <i>ino</i> : 1F vs 2F | 0.9958        | 0.9932          | 0.9713             | 0.9942        |
| <i>ino</i> : 2F vs 3F | 0.9972        | 0.9937          | 0.9687             | 0.9949        |
| <i>ino</i> : 1F vs 3F | 0.9966        | 0.9938          | 0.9696             | 0.9950        |
| WT: 1F vs 2F          | 0.9936        | 0.9888          | 0.9590             | 0.9921        |
| WT: 2F vs 3F          | 0.9965        | 0.9930          | 0.9657             | 0.9947        |
| WT: 1F vs 3F          | 0.9930        | 0.9878          | 0.9575             | 0.9876        |
| <b>Average</b>        | <i>0.9956</i> | <i>0.9912</i>   | <i>0.9680</i>      | <i>0.9920</i> |
| <b>Median</b>         | <i>0.9959</i> | <i>0.9930</i>   | <i>0.9696</i>      | <i>0.9924</i> |
