# Supplementary material for: Expression-based discovery of candidate ovule development regulators through transcriptional profiling of ovule mutants
Source: PubMed Central journal article supplement (PMC2664812; doi:10.1186/1471-2229-9-29), 2009-03-16

**Additional file 3: Overlap between genes identified as significantly changed between mutant and wildtype using dchip and RMA-*limma*.**

(A) WT E vs *ant* E; (B) WT F vs *ino* F

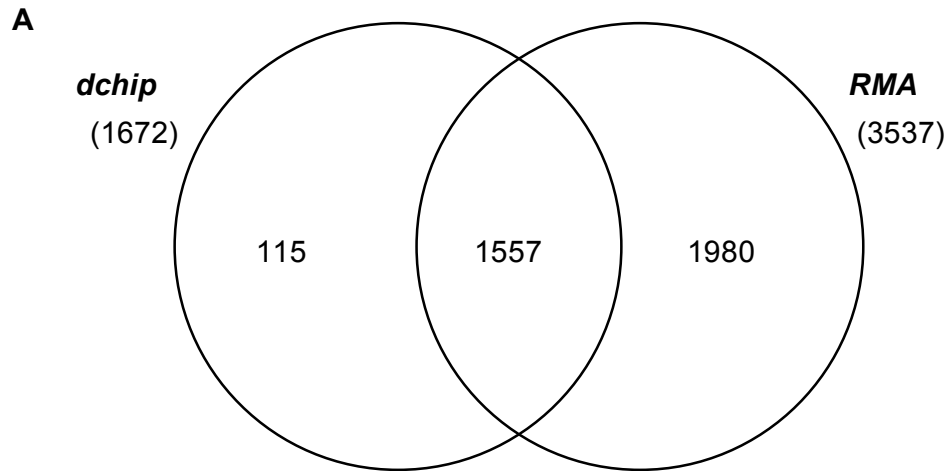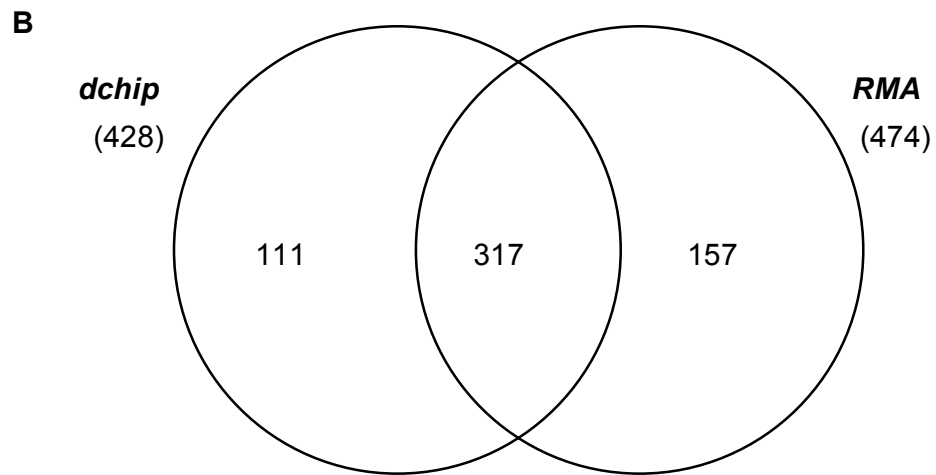

Supplement: 1471-2229-9-29-S3.pdf [file 1471-2229-9-29-S3.pdf]
