# Supplementary material for: Expression-based discovery of candidate ovule development regulators through transcriptional profiling of ovule mutants
Source: PubMed Central journal article supplement (PMC2664812; doi:10.1186/1471-2229-9-29), 2009-03-16
Supplement: 1471-2229-9-29-S4.pdf [file 1471-2229-9-29-S4.pdf]

**Additional file 4: Fold change values for genes known to be expressed in ovules as determined with two different analysis methods.**

| Name  | Accession | Probe     | WT E/ant E   |               | WT F/ino F   |               | Ref. |
|-------|-----------|-----------|--------------|---------------|--------------|---------------|------|
|       |           |           | dchip<br>-LB | RMA-<br>limma | dchip<br>-LB | RMA-<br>limma |      |
| ACR4  | At3g59420 | 251521_at | NI           | 1.3           |              |               | [1]  |
| AIL5  | At5g53790 | 247904_at | 1.9          | 2.2           |              |               | [2]  |
| AP3   | At3g54340 | 251898_at | NI           | 1.8           | 4            | 6.4           | [3]  |
|       | At4g12960 | 254777_at | 7.8          | 12            | 1.8          | NI            |      |
| ATML1 | At1g21750 | 254370_at | 1.5          | 1.4           |              |               | [4]  |
| ATS   | At5g42630 | 249206_at | 3.7          | 7.1           |              |               | [5]  |
| BEL1  | At1g75430 | 261111_at | NI           | 2             |              |               | [6]  |
| ERL1  | At5g62230 | 247471_at | 1.8          | 2             |              |               | [7]  |
| ERL2  | At5g07180 | 250642_at | 1.8          | 1.8           |              |               | [7]  |
| INO   | At1g23420 | 262989_at | 9.8          | 10.3          | 8.4          | 9.1           | [8]  |
| PDF2  | At4g04890 | 255277_at | 1.8          | 1.8           |              |               | [9]  |
| PFS2  | At2g01500 | 266354_at | 1.5          | 2.2           | 1.4          | 1.6           | [10] |
| PHB   | At2g34710 | 267316_at | 1.6          | 1.6           |              |               | [11] |
| PIN1  | At1g73590 | 259845_at | 1.6          | 1.6           |              |               | [12] |
| RBE   | At5g06070 | 250708_at | NI           | 2.3           | NI           | 2             | [13] |
| SHP2  | At2g42830 | 263988_at | NI           | 1.3           |              |               | [14] |
| SPT   | At4g36930 | 246212_at | 1.4          | 1.5           |              |               | [15] |

**REFERENCES**

1. Gifford ML, Dean S, Ingram GC: **The Arabidopsis *ACR4* gene plays a role in cell layer organisation during ovule integument and sepal margin development.** *Development* 2003, **130**:4249-4258.
2. Nole-Wilson S, Tranby TL, Krizek BA: ***AINTEGUMENTA-like (AIL)* genes are expressed in young tissues and may specify meristematic or division-competent states.** *Plant Mol Biol* 2005, **57**:613-628.
3. Hill TA, Day CD, Zondlo SC, Thackeray AG, Irish VF: **Discrete spatial and temporal cis-acting elements regulate transcription of the Arabidopsis floral homeotic gene *APETALA3*.** *Development* 1998, **125**:1711-1721.
4. Lu P, Porat R, Nadeau JA, O'Neill SD: **Identification of a meristem L1 layer-specific gene in Arabidopsis that is expressed during embryonic pattern formation and defines a new class of homeobox genes.** *Plant Cell* 1996, **8**:2155-2168.
5. McAbee JM, Hill TA, Skinner DJ, Itzaki A, Hauser BA, Meister RJ, Reddy VG, Meyerowitz EM, Bowman JL, Gasser CS: ***ABERRANT TESTA SHAPE* encodes a KANADI family member, linking polarity determination to separation and growth of Arabidopsis ovule integuments.** *in preparation* 2005.
6. Reiser L, Modrusan Z, Margossian L, Samach A, Ohad N, Haughn GW, Fischer RL: **The *BELL1* gene encodes a homeodomain protein involved in pattern formation in the Arabidopsis ovule primordium.** *Cell* 1995, **83**:735-742.

7. Shpak ED, Berthiaume CT, Hill EJ, Torii KU: **Synergistic interaction of three ERECTA-family receptor-like kinases controls Arabidopsis organ growth and flower development by promoting cell proliferation.** *Development* 2004, **131**:1491-1501.
8. Villanueva JM, Broadhvest J, Hauser BA, Meister RJ, Schneitz K, Gasser CS: **INNER NO OUTER regulates abaxial-adaxial patterning in Arabidopsis ovules.** *Genes Dev* 1999, **13**:3160-3169.
9. Abe M, Katsumata H, Komeda Y, Takahashi T: **Regulation of shoot epidermal cell differentiation by a pair of homeodomain proteins in Arabidopsis.** *Development* 2003, **130**:635-643.
10. Park SO, Zheng Z, Oppenheimer DG, Hauser BA: **The PRETTY FEW SEEDS2 gene encodes an Arabidopsis homeodomain protein that regulates ovule development.** *Development* 2005, **132**:841-849.
11. Sieber P, Gheyselinck J, Gross-Hardt R, Laux T, Grossniklaus U, Schneitz K: **Pattern formation during early ovule development in Arabidopsis thaliana.** *Dev Biol* 2004, **273**:321-334.
12. Benkova E, Michniewicz M, Sauer M, Teichmann T, Seifertova D, Jurgens G, Friml J: **Local, efflux-dependent auxin gradients as a common module for plant organ formation.** *Cell* 2003, **115**:591-602.
13. Krizek BA, Lewis MW, Fletcher JC: **RABBIT EARS is a second-whorl repressor of AGAMOUS that maintains spatial boundaries in Arabidopsis flowers.** *Plant J* 2006, **45**:369-383.
14. Savidge B, Rounsley SD, Yanofsky MF: **Temporal relationship between the transcription of two Arabidopsis MADS box genes and the floral organ identity genes.** *Plant Cell* 1995, **7**:721-733.
15. Heisler MG, Atkinson A, Bylstra YH, Walsh R, Smyth DR: **SPATULA, a gene that controls development of carpel margin tissues in Arabidopsis, encodes a bHLH protein.** *Development* 2001, **128**:1089-1098.
