# Supplementary material for: Expression-based discovery of candidate ovule development regulators through transcriptional profiling of ovule mutants
Source: PubMed Central journal article supplement (PMC2664812; doi:10.1186/1471-2229-9-29), 2009-03-16
Supplement: 1471-2229-9-29-S6.pdf [file 1471-2229-9-29-S6.pdf]

**Additional file 6: Selected genes with known carpel expression patterns identified by the arrays.**

| Gene                                                                               | Cluster | FC   | Function                              | Expression Pattern                                                              | Ref.   |
|------------------------------------------------------------------------------------|---------|------|---------------------------------------|---------------------------------------------------------------------------------|--------|
| <b>A: Expression early in ovule primordia, placenta and integuments</b>            |         |      |                                       |                                                                                 |        |
| <i>NUB</i>                                                                         | 4       | -1.6 | Lateral growth, adaxial carpel growth | Adaxial carpel, placenta, ovule primordia.                                      | [1]    |
| <i>CRC</i>                                                                         | 8       | -2.2 | Carpel specification                  | Abaxial carpel, inner strand next to placenta.                                  | [2]    |
| <i>CUC2</i>                                                                        | 8       | -1.7 | Organ separation                      | Placenta, between ovule primordia, septum, nucellus/chalaza boundary.           | [3]    |
| <i>ER</i>                                                                          | 8       | -1.4 | Growth inhibitor signal               | Early carpels, carpel walls, slightly in ovules                                 | [4, 5] |
| <i>LFY</i>                                                                         | 8       | -1.4 | Floral induction                      | In carpels?                                                                     | [6]    |
| <i>PAN</i>                                                                         | 8       | -2.2 | Organ number                          | Early medial region, placenta, ovule primordia, slightly in later ovules        | [7]    |
| <i>SPT</i>                                                                         | 8       | -1.5 | Growth of medial carpel regions       | Medial region, ridge, septum, stigma, ovule primordia, integument tips, mmc     | [8]    |
| <i>PIN1</i>                                                                        | 9       | -1.6 | Polar auxin transport                 | L1, carpel primordia, ovule primordia, integuments.                             | [9]    |
| <i>ATML1</i>                                                                       | 6       | -1.4 | L1 identity                           | L1 of meristems, placenta, ovule primordia, integument primordia.               | [10]   |
| <i>BEL1</i>                                                                        | 10      | -2.7 | Chalazal specification                | Chalaza and integuments.                                                        | [11]   |
| <i>ATCEL2</i>                                                                      | 10      | -1.7 | Cellulase, wall extension             | Placenta, ovule primordia, septum                                               | [12]   |
| <i>ETT</i>                                                                         | 10      | -2.4 | auxin response growth regulator       | Abaxial carpel, replum                                                          | [13]   |
| <b>B: Expression in carpel, ovule primordia, integuments or embryo sac</b>         |         |      |                                       |                                                                                 |        |
| <i>MP</i>                                                                          | 0       | -1.6 | TF mediating auxin signals            | Center of ovule primordia, adaxial carpel wall, integuments not described.      | [14]   |
| <i>PHB</i>                                                                         | 2       | -1.6 | Adaxial identity                      | Adaxial inner integument, carpel?                                               | [15]   |
| <i>ERL2</i>                                                                        | 2       | -1.8 | Epidermal patterning                  | Early carpels, ovules, outer integument higher, style.                          | [5]    |
| <i>PDF2</i>                                                                        | 2       | -1.8 | L1 identity                           | L1 of carpel and ovule primordia, integuments not described                     | [16]   |
| <i>AIL5</i>                                                                        | 2       | -2.2 | ANT-like control of organ size        | Medial ridge, placenta, ovule primordia, distal funiculus and outer integument. | [17]   |
| <b>C: expression in carpel, ovule primordia or integuments late in development</b> |         |      |                                       |                                                                                 |        |
| <i>FDH</i>                                                                         | 3       | -1.4 | Long chain lipids                     | Ovule primordia, integuments, later in chalazal pole.                           | [18]   |
| <i>ERL1</i>                                                                        | 11      | -2.0 | Epidermal patterning                  | Early carpel primordia, ovules.                                                 | [5]    |
| <i>PFS2</i>                                                                        | 11      | -2.2 | Repression of AG?                     | Placenta, ovule primordia, chalaza, integuments, nucellus.                      | [19]   |

1. Dinneny JR, Weigel D, Yanofsky MF: **NUBBIN and JAGGED define stamen and carpel shape in Arabidopsis.** *Development* 2006, **133**:1645-1655.
2. Bowman JL, Smyth DR: **CRABS CLAW, a gene that regulates carpel and nectary development in Arabidopsis, encodes a novel protein with zinc finger and helix-loop-helix domains.** *Development* 1999, **126**:2387-2396.
3. Ishida T, Aida M, Takada S, Tasaka M: **Involvement of CUP-SHAPED COTYLEDON genes in gynoecium and ovule development in Arabidopsis thaliana.** *Plant Cell Physiol* 2000, **41**:60-67.
4. Torii KU, Mitsukawa N, Oosumi T, Matsuura Y, Yokoyama R, Whittier RF, Komeda Y: **The arabidopsis ERECTA gene encodes a putative receptor protein kinase with extracellular leucine-rich repeats.** *Plant Cell* 1996, **8**:735-746.
5. Shpak ED, Berthiaume CT, Hill EJ, Torii KU: **Synergistic interaction of three ERECTA-family receptor-like kinases controls Arabidopsis organ growth and flower development by promoting cell proliferation.** *Development* 2004, **131**:1491-1501.
6. Weigel D, Alvarez J, Smyth DR, Yanofsky MF, Meyerowitz EM: **LEAFY controls floral meristem identity in Arabidopsis.** *Cell* 1992, **69**:843-859.
7. Chuang CF, Running MP, Williams RW, Meyerowitz EM: **The PERIANTHIA gene encodes a bZIP protein involved in the determination of floral organ number in Arabidopsis thaliana.** *Genes Dev* 1999, **13**:334-344.
8. Heisler MG, Atkinson A, Bylstra YH, Walsh R, Smyth DR: **SPATULA, a gene that controls development of carpel margin tissues in Arabidopsis, encodes a bHLH protein.** *Development* 2001, **128**:1089-1098.
9. Benkova E, Michniewicz M, Sauer M, Teichmann T, Seifertova D, Jurgens G, Friml J: **Local, efflux-dependent auxin gradients as a common module for plant organ formation.** *Cell* 2003, **115**:591-602.
10. Lu P, Porat R, Nadeau JA, O'Neill SD: **Identification of a meristem L1 layer-specific gene in Arabidopsis that is expressed during embryonic pattern formation and defines a new class of homeobox genes.** *Plant Cell* 1996, **8**:2155-2168.
11. Reiser L, Modrusan Z, Margossian L, Samach A, Ohad N, Haughn GW, Fischer RL: **The BELLI gene encodes a homeodomain protein involved in pattern formation in the Arabidopsis ovule primordium.** *Cell* 1995, **83**:735-742.
12. Yung MH, Schaffer R, Putterill J: **Identification of genes expressed during early Arabidopsis carpel development by mRNA differential display: characterisation of ATCEL2, a novel endo-1,4-beta-D-glucanase gene.** *Plant Journal* 1999, **17**:203-208.
13. Sessions A, Nemhauser JL, McColl A, Roe JL, Feldmann KA, Zambryski PC: **ETTIN patterns the Arabidopsis floral meristem and reproductive organs.** *Development* 1997, **124**:4481-4491.
14. Hardtke CS, Berleth T: **The Arabidopsis gene MONOPTEROS encodes a transcription factor mediating embryo axis formation and vascular development.** *EMBO J* 1998, **17**:1405-1411.
15. Sieber P, Gheyselinck J, Gross-Hardt R, Laux T, Grossniklaus U, Schneitz K: **Pattern formation during early ovule development in Arabidopsis thaliana.** *Dev Biol* 2004, **273**:321-334.

16. Abe M, Katsumata H, Komeda Y, Takahashi T: **Regulation of shoot epidermal cell differentiation by a pair of homeodomain proteins in Arabidopsis.** *Development* 2003, **130**:635-643.
17. Nole-Wilson S, Tranby TL, Krizek BA: ***AINTEGUMENTA-like (AIL)* genes are expressed in young tissues and may specify meristematic or division-competent states.** *Plant Mol Biol* 2005, **57**:613-628.
18. Pruitt RE, Vielle-Calzada JP, Ploense SE, Grossniklaus U, Lolle SJ: ***FIDDLEHEAD*, a gene required to suppress epidermal cell interactions in Arabidopsis, encodes a putative lipid biosynthetic enzyme.** *Proc Natl Acad Sci U S A* 2000, **97**:1311-1316.
19. Park SO, Zheng Z, Oppenheimer DG, Hauser BA: **The *PRETTY FEW SEEDS2* gene encodes an Arabidopsis homeodomain protein that regulates ovule development.** *Development* 2005, **132**:841-849.
