# Supplementary material for: Expression-based discovery of candidate ovule development regulators through transcriptional profiling of ovule mutants
Source: PubMed Central journal article supplement (PMC2664812; doi:10.1186/1471-2229-9-29), 2009-03-16
Supplement: 1471-2229-9-29-S10.pdf [file 1471-2229-9-29-S10.pdf]

**Additional file 10: Mean natural scale RMA values of putatively root-specific genes in the 17 pistil arrays.**

| <b>Gene</b> | <b>Affymetrix ID</b>      | <b>Mean value</b> |
|-------------|---------------------------|-------------------|
| At1g02230   | 264174_s_at               | 12.10             |
| At1g03840   | 265081_at                 | 11.79             |
| At1g28160   | 259590_at                 | 13.48             |
| At1g47790   | 261734_at                 | 9.13              |
| At1g74080   | 260394_at                 | 9.79              |
| At2g16910   | 266530_at                 | 11.34             |
| At2g28700   | 263444_at                 | 11.56             |
| At2g32460   | 267087_at                 | 19.39             |
| At2g33720   | 267450_at                 | 13.11             |
| At3g20840   | 257976_at                 | 13.06             |
| At3g30210   | 257307_at                 | 15.85             |
| At3g49760   | 252232_at                 | 9.29              |
| At3g56560   | 251694_s_at               | 7.53              |
| At4g18450   | 254674_at                 | 13.56             |
| At5g01860   | 251064_at                 | 21.47             |
| At5g04390   | 245705_at                 | 10.08             |
| At5g49240   | 248649_at                 | 15.18             |
| At5g52260   | 248343_at                 | 9.91              |
| At5g54230   | 248203_at                 | 7.86              |
| At5g62320   | 247451_at                 | 22.55             |
|             |                           |                   |
|             | <b>Mean</b>               | <b>12.90</b>      |
|             | <b>Median</b>             | <b>11.79</b>      |
|             | <b>Standard deviation</b> | <b>2.16</b>       |
|             | <b>Standard error</b>     | <b>0.12</b>       |
|             | <b>Maximum</b>            | <b>44.83</b>      |
