# Supplementary material for: Expression-based discovery of candidate ovule development regulators through transcriptional profiling of ovule mutants
Source: PubMed Central journal article supplement (PMC2664812; doi:10.1186/1471-2229-9-29), 2009-03-16
Supplement: 1471-2229-9-29-S11.pdf [file 1471-2229-9-29-S11.pdf]

**Additional file 11: Genes tested with qRT-PCR and primers used.**

| Gene                   | Name or protein domain | Product Length | Primers     | Primer sequence            | primer position |
|------------------------|------------------------|----------------|-------------|----------------------------|-----------------|
| AT4G27090 <sup>#</sup> | 60S<br>RPL14           | 232            | RPL14B-Fw   | GAGAGGATCCAGATGAACTTCAAGA  | exon-exon       |
|                        |                        |                | RPL14B-Rv   | GCTCTTGCCTGACAACACCAGCTTT  |                 |
| AT1G23420              | INO                    | 106            | INOqFW1     | GGTGAATCAGGAGAAGGAGAACAG   | exon-exon       |
|                        |                        |                | INOqRV1     | CTCAGGTGGTTTATTGACAACCTGG  |                 |
| AT1G68190              | Zn Finger<br>Bbox      | 78             | 1g68190qFW1 | TCCCTCCCTCTCTAACAATACACG   | exon-exon       |
|                        |                        |                | 1g68190qRV1 | TTCTCCTCCACTCTTGCTCTCTTC   |                 |
| AT1G71030              | Myb<br>domain          | 134            | 1g71030qFW1 | ATAGATGGTCATTGATAGCGGGAAG  | no intron       |
|                        |                        |                | 1g71030qRV1 | GTGATGGTGGAGACGATGATTGG    |                 |
| AT1G79700*             | ANT-like               | 189            | 1g79700qFW1 | AGCGTCTGCGTCTGAGTCTG       | intron incl     |
|                        |                        |                | 1g79700qRV1 | CGTCCTTTCTTGGTCTGTGTATCG   |                 |
| AT2G01500              | WOX6                   | 124            | 2g01500qFW1 | CGTCGTGAAGGTGGTGCTATTATC   | intron incl     |
|                        |                        |                | 2g01500qRV1 | GTGGCTGTGGTCGGTTTGTG       |                 |
| AT2G33830              | kinase                 | 78             | 2g33830qFW1 | TGACATCAAAGGAGAAGGGAGCAG   | exon-exon       |
|                        |                        |                | 2g33830qRV1 | CCTGGCGTCGTCGGAGTTC        |                 |
| AT2G34700              | OLE E1<br>allergen     | 290            | 2g34700qFW1 | TTCAAGGAGCGACCGTAAAGC      | exon-exon       |
|                        |                        |                | 2g34700qRV1 | GAAGGGACCAACAGAGAAGAGAAC   |                 |
| AT3G54340              | AP3                    | 165            | 3g54340qFW1 | AGCCCTAACACCACAACGAAG      | exon-exon       |
|                        |                        |                | 3g54340qRV1 | CAAACACTCACCTAGCCTCTGC     |                 |
| AT5G03790              | HB L-zip<br>class I    | 118            | 5g03790qFW1 | CTTACGCAGCAGGAAATTCATATACG | exon-exon       |
|                        |                        |                | 5g03790qRV1 | ATCTCATTGTTGTTGTTTCGGAATCG |                 |
| AT5G42630              | ATS/KAN4               | 201            | 5g42630qFW1 | GGTAGAGAAAGAGGCAGAGCAGAG   | intron incl     |
|                        |                        |                | 5g42630qRV1 | TTGTCCTTAGTGTGATGAGTTGTTCC |                 |
| AT5G57720              | B3 domain              | 125            | 5g57720qFW1 | CAAGAAAGGAAGGGTTACAAGAAAGC | exon-exon       |
|                        |                        |                | 5g57720qRV1 | ATATACGCCTGGAACACGATGAAG   |                 |
| AT2G23060              | GNAT<br>family         | 153            | 2g23060qFW1 | ATGCTGGTGGCTGAGATTGG       | exon-exon       |
|                        |                        |                | 2g23060qRV1 | AAGTGGTTTGGTAATAACGACATCG  |                 |
| AT4G36740              | HB L-zip<br>class I    | 86             | 4g36740qFW1 | ACAACCACTAGGAGAAGTGAAGC    | exon-exon       |
|                        |                        |                | 4g36740qRV1 | AACCGTTGCCTCCATCTGC        |                 |
| AT5G17300              | Myb<br>domain          | 152            | 5g17300qFW1 | GTTATGGCGTCGTCTCCGTTG      | exon-exon       |
|                        |                        |                | 5g17300qRV1 | GTGTATGGCTTCCGTACCTTGG     |                 |

\*At4g27090 was used as the cellular reference standard.
